# Supplementary material
Source: PubMed Central journal article supplement (PMC520960)
Supplement: plntcell_tpc.104.023879_1.pdf [file plntcell_tpc.104.023879_1.pdf]

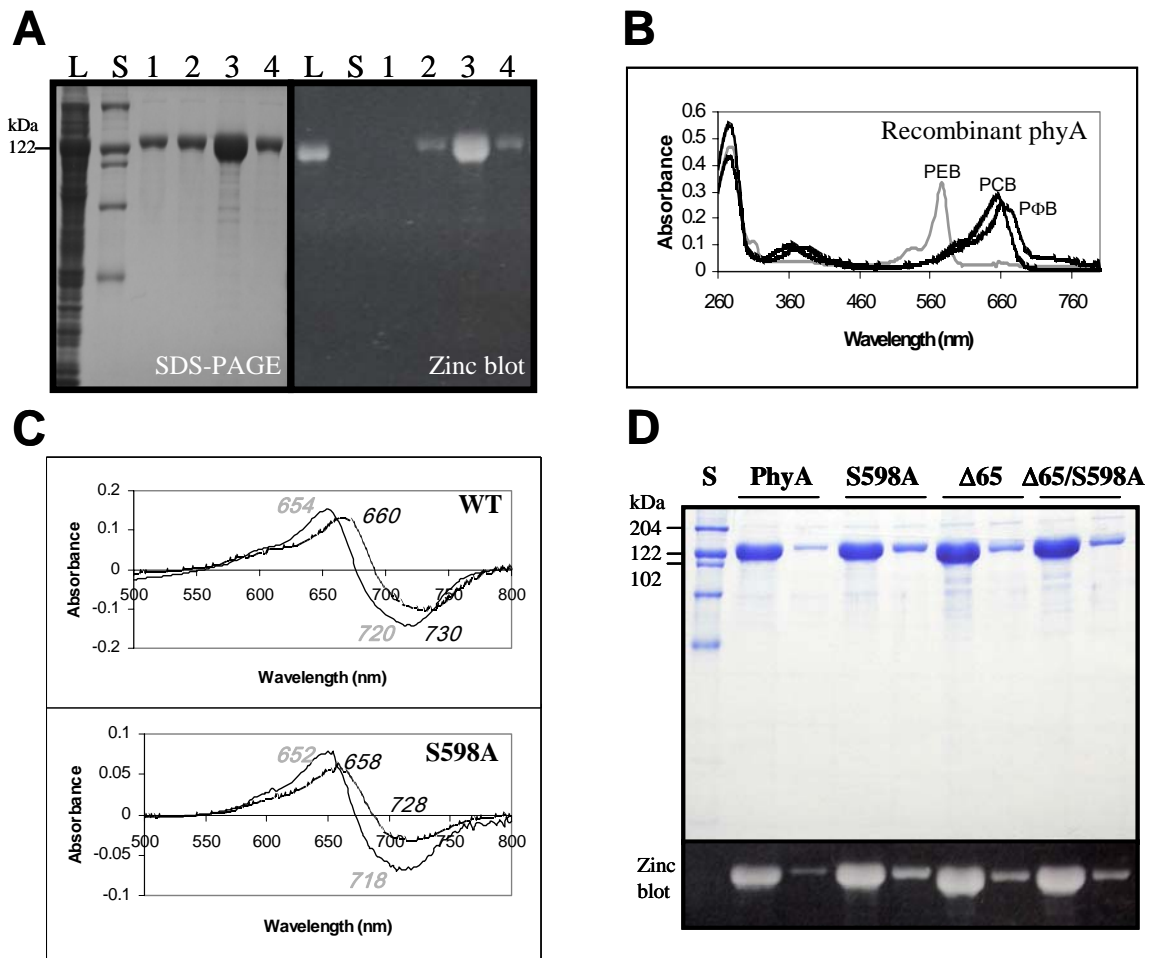

**Supplemental Figure 1.** Recombinant phytochrome proteins. All phytochrome proteins were expressed by using *Pichia* expression system as described in METHODS, and purified by streptavidin affinity chromatography. *A*. Purified apo- and holo-phyA assembled with PCB, PEB and PΦB. lane L, loaded extract of PCB-phyA; lane S, protein standards; lane 1, apo-phyA; lane 2, PEB-phyA; lane 3, PCB-phyA; lane 4, PΦB-phyA. *B*. Absorption spectra of purified recombinant holo-phyA proteins. *C*. Difference spectra of wild-type phyA (WT) and S598A mutant phyA proteins. *D*. SDS-PAGE and zinc blot of phytochrome proteins used in this work. Two different elution fractions were loaded on the SDS-PAGE gel. Lane S, Protein standards.
