# Supplementary material
Source: PubMed Central journal article supplement (PMC520960)
Supplement: plntcell_tpc.104.023879_2.pdf [file plntcell_tpc.104.023879_2.pdf]

**Supplemental Table 1.** Photochemical properties of the purified phyA proteins.

|                 | PCB-phy               |                        | PΦB-phy               |                        | PEB-phy               | SAR       | $\lambda_{\text{min}}/\lambda_{\text{max}}^{\text{a}}$ |
|-----------------|-----------------------|------------------------|-----------------------|------------------------|-----------------------|-----------|--------------------------------------------------------|
|                 | $\lambda_{\text{Pr}}$ | $\lambda_{\text{Pfr}}$ | $\lambda_{\text{Pr}}$ | $\lambda_{\text{Pfr}}$ | $\lambda_{\text{Pr}}$ |           |                                                        |
| Native oat phyA | -                     | -                      | 666±2                 | 730±2                  | -                     | 1.02±0.05 | 1.000                                                  |
| Wild-type phyA  | 654±2                 | 720±2                  | 660±2                 | 730±2                  | 576±2                 | 0.69±0.05 | 0.995                                                  |
| S598A phyA      | 654±2                 | 720±2                  | 658±2                 | 728±2                  | 576±2                 | 0.70±0.05 | 0.998                                                  |
| Δ65 phyA        | 652±2                 | 714±2                  | 658±2                 | 726±2                  | 574±2                 | 0.72±0.05 | 0.770                                                  |
| Δ65/S598A phyA  | 650±2                 | 714±2                  | 656±2                 | 726±2                  | 572±2                 | 0.73±0.05 | 0.780                                                  |

<sup>a</sup> The SAR value is the ratio of the Pr absorbance maxima to the 280nm absorbance peak. The elution fractions from streptavidin affinity chromatography were used for this.

<sup>b</sup> The ratio of the heights of Pfr ( $\lambda_{\text{max}}$ ) and Pr ( $\lambda_{\text{min}}$ ) peaks in difference spectra to represent the perfection of photoconversion.
